# Supplementary material for: Atg8 family LC3/GABARAP proteins are crucial for autophagosome–lysosome fusion but not autophagosome formation during PINK1/Parkin mitophagy and starvation
Source: PubMed Central journal article supplement — J Cell Biol. 2016 Dec 19;215(6):857–74. doi: 10.1083/jcb.201607039 (PMC5166504; doi:10.1083/jcb.201607039), 2016-12-19
Supplement: JCB_201607039_TableS3.pdf [file JCB_201607039_TableS3.pdf]

Table S3. **Details of CRISPR sequences, genotyping results of all knockout cell lines in this study**

| Gene Symbol      | Uniprot | GenelD/ Location        | Targeting strategy       | CRISPR gRNA (PAM)        | Main clone                               | Depth/ Unique Alleles | Mutation                                                                                                                                                                                                                                                                                                                                              | Protein impact                              |
|------------------|---------|-------------------------|--------------------------|--------------------------|------------------------------------------|-----------------------|-------------------------------------------------------------------------------------------------------------------------------------------------------------------------------------------------------------------------------------------------------------------------------------------------------------------------------------------------------|---------------------------------------------|
| <i>STX17</i>     | P56962  | 55014/<br>NC_000009.12  | Targets the fourth exon. | ACCAGATCCATGACTGTTGGTGGG | #13                                      | 5/3                   | c.[411_412insT]; [411del]; [411_414del]                                                                                                                                                                                                                                                                                                               | p.[G138Wfs*11]; [G138Wfs*19]; [G138Efs*18]  |
| <i>VPS39</i>     | Q96JC1  | 23339/<br>NC_000015.10  | Targets the first exon.  | ATCGACTGTCTGGCTGCCTGGG   | #20                                      | 5/2                   | c.[68_69insAGTCAGATGTTGGAACCTGGAGTCCATT<br>AGAAGACGTCTGGGGAGCGGCCGAGGAACCCCT<br>AGTGATGGAGTTGGCCACTCCCTCTCTGCGCGCTCG<br>CTCGCTCACTGAGGCCGGGGCGACCAC];<br>[68_69insACGCCATTCTGCGGCGGCAGGAAGATTTT<br>ACCCATTCTGAAGGACAACCGGGAAAAGATCGAG<br>AAGATCCTGACCTCCGCGAGGCGAGTTACATGATCC<br>CCCATGTTGTCAAAAAGCGGTTAGCTCCTTCGGTC<br>CTCCGATCGTTGCAGAAGTAAGTTGGCCC | p.[W24Vfs*10]; [W24Rfs*42]                  |
| <b>LC3 TKO</b>   |         |                         |                          |                          |                                          |                       |                                                                                                                                                                                                                                                                                                                                                       |                                             |
| <i>MAP1LC3A</i>  | Q9H492  | 84557/<br>NC_000020.11  | Targets the third exon.  | TCAAGATCATCCGGTGCCTGG    | #39                                      | 5/2                   | c.[203+2_203+3insT];[203+2_203+3del]                                                                                                                                                                                                                                                                                                                  | p.[?];[?] (affecting splicing)              |
| <i>MAP1LC3B</i>  | Q9GZQ8  | 81631/<br>NC_000016.10  | Targets the second exon. | ATCCAACCAAAATCCCGGTAGG   |                                          | 5/2                   | c.[95del];[85_96+3del]                                                                                                                                                                                                                                                                                                                                | p.[P32Rfs*2];[?] (affecting splicing)       |
| <i>MAP1LC3C</i>  | Q9BXW4  | 440738/<br>NC_000001.11 | Targets the third exon.  | CACTCTTGACAGGTGGTAGTGG   | #15 (made from LC3A/B DKO #39)           | 5/3                   | c.[118_127del];[114_117del];[115_123del]                                                                                                                                                                                                                                                                                                              | p.[V40Afs*61]; [V39*]; [V39_V41del]         |
| <b>GBRP TKO</b>  |         |                         |                          |                          |                                          |                       |                                                                                                                                                                                                                                                                                                                                                       |                                             |
| <i>GABARAP</i>   | O95166  | 11337/<br>NC_000017.11  | Targets the first exon.  | GATCTTCTCGCCCTCAGAGCGG   | #54                                      | 5/2                   | c.[25_57del];[63_64insA]                                                                                                                                                                                                                                                                                                                              | p.[H9_E19del]; [R22Tfs*33]                  |
| <i>GABARAPL1</i> | Q9H0R8  | 23710/<br>NC_000012.12  | Targets the second exon. | ATTACCAGTAAGGTCAGAGG     |                                          | 5/2                   | c.[165_169+4del];[160_161del]                                                                                                                                                                                                                                                                                                                         | p.[T56Wfs*16]; [N54Pfs*19]                  |
| <i>GABARAPL2</i> | P60520  | 11345/<br>NC_000016.1   | Targets the second exon. | CGACAGGGTCCGGTGAGTGG     | #7 (made from GABARAP/GABARAPL1 DKO #54) | 5/3                   | c.[90+1_90+3del];[89_90del];[90+2del]                                                                                                                                                                                                                                                                                                                 | p.[?]; [?];[?] (affecting splicing)         |
| <b>Hexa KO</b>   |         |                         |                          |                          |                                          |                       |                                                                                                                                                                                                                                                                                                                                                       |                                             |
| <i>GABARAP</i>   | O95166  | 11337/<br>NC_000017.11  | Targets the first exon.  | GATCTTCTCGCCCTCAGAGCGG   | #54                                      | 5/2                   | c.[25_57del];[63_64insA]                                                                                                                                                                                                                                                                                                                              | p.[H9_E19del]; [R22Tfs*33]                  |
| <i>GABARAPL1</i> | Q9H0R8  | 23710/<br>NC_000012.12  | Targets the second exon. | ATTACCAGTAAGGTCAGAGG     |                                          | 5/2                   | c.[165_169+4del];[160_161del]                                                                                                                                                                                                                                                                                                                         | p.[T56Wfs*16]; [N54Pfs*19]                  |
| <i>MAP1LC3A</i>  | Q9H492  | 84557/<br>NC_000020.11  | Targets the third exon.  | TCAAGATCATCCGGTGCCTGG    | #2 (made from GABARAP/L1 DKO #54)        | 5/2                   | c.[203+1G>T;203+2_203+7del];[200_201insG;203_203+2GGT>CAC]                                                                                                                                                                                                                                                                                            | p.[?]; p.[I71Mfs*60;?] (affecting splicing) |

|           |        |                         |                                       |                                                                                   |     |                                                                                                                                                                                                                                                                                                                                                                                                                                                                     |                                |
|-----------|--------|-------------------------|---------------------------------------|-----------------------------------------------------------------------------------|-----|---------------------------------------------------------------------------------------------------------------------------------------------------------------------------------------------------------------------------------------------------------------------------------------------------------------------------------------------------------------------------------------------------------------------------------------------------------------------|--------------------------------|
| MAP1LC3B  | Q9GZQ8 | 81631/<br>NC_000016.10  | Targets the<br>second exon.           | ATCCAACCAAAATCCCGGTAGG                                                            | 5/1 | c.[95_96+360del]                                                                                                                                                                                                                                                                                                                                                                                                                                                    | p.[P32Rfs*2]                   |
| MAP1LC3C  | Q9BXW4 | 440738/<br>NC_000001.11 | Targets the<br>third exon.            | CACTCTTGACAGGTGGTAGTGG #51 (made<br>from<br>GABARAP/L1/<br>LC3A/B tetra<br>KO #2) | 9/2 | c.[117_118insCCAGGTCTGAAGTTGCTCTTGAAGTTGG<br>GGGTCAGGCCAGGCTCAGGGCAATCAGGTTCCG<br>AACAGGCCATTCTTCTCGCCGGGCAGCTGGGCG<br>ATCAGATTTCCGGCCGTCTGCTTGTCTCAGTCTGGC<br>AGACAGGATGGCCTTGGCGTCCACGCCGCTGGCGT<br>TGATGGGGTTTCTCGAACAGCTGGTTGTAGGTCTG<br>CACCAGCTGGATGAACAGCTGTCCACGTCGCTGTT<br>GTCGGGGTTCAGGTCGCCCTCGATCAGGAAGTGGC<br>TCCGGAACCTTGATCATGTGGGCCAGGGCCAGATAG<br>ATCAGCCGCAGGTCGGCCTTGTGGTGTCTGCCACC<br>AGTTTCTTCTCAGGTGGTAGATGGTGGGGTACTTCTC<br>G]; [118_123del] | p.[V40Afs*68];<br>[V40_V41del] |
| GABARAPL2 | P60520 | 11345/<br>NC_000016.1   | Targets<br>within the<br>second exon. | CGACAGGGTCCGGTGAGTGG                                                              | 5/2 | c.[89_90+2del];[90_90+1del]                                                                                                                                                                                                                                                                                                                                                                                                                                         | p.[P30Rfs*13];[V31*]           |

The indels detected in the knockout cell lines (Mutation column) and their resulting proteins (Protein impact column) are formatted according to Human Genome Variation Society (<http://varnomen.hgvs.org/>). For genes with multiple splice variants, mutation positions are determined using the variant that encodes for the canonical isoform annotated in Uniprot. The numbers after the asterisks represent the number of amino acids made from the first amino acid changed to the first stop codon encountered. del, deletion; ins, insertion; c., coding DNA; p., protein; fs, frame shift; \*, stop codon; [?], affecting splicing.
